# Supplementary material for: Thermal chemical vapor deposition of layered carbon nitride films under a hydrogen gas atmosphere
Source: Royal Society of Chemistry journal article supplement (doi:10.1039/d2ce01515c), 2022-12-26
Supplement: d2ce01515c1.pdf [file d2ce01515c1.pdf]

## Supplementary Information

# Thermal chemical vapor deposition of layered carbon nitride films under hydrogen gas atmosphere

Noriyuki Urakami<sup>\*, †, ‡</sup>, Kensuke Takashima<sup>†</sup>, Masahiro Shimizu<sup>§</sup>,

and Yoshio Hashimoto<sup>†, ‡</sup>

<sup>†</sup> *Department of Electrical and Computer Engineering,*

*Shinshu University, 4-17-1 Wakasato, Nagano, 380-8553, Japan*

<sup>‡</sup> *Research Initiative for Supra-Materials,*

*Shinshu University, 4-17-1 Wakasato, Nagano 380-8533, Japan*

<sup>§</sup> *Department of Materials Chemistry, Faculty of Engineering,*

*Shinshu University 4-17-1 Wakasato, Nagano, 380-855, Japan*

\* Corresponding author

Noriyuki Urakami

E-mail: urakami@shinshu-u.ac.jp

Tel: +81-26-269-5261; Fax: +81-26-269-5200

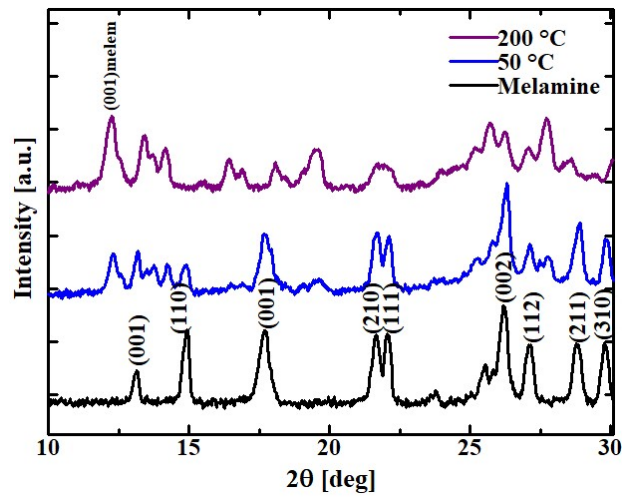

**Figure S1.** X-ray diffraction profiles for pristine melamine powder and heated melamine powder at 50 and 200 °C. Chemical vapor deposition in this study was conducted at a precursor temperature of 200 °C.

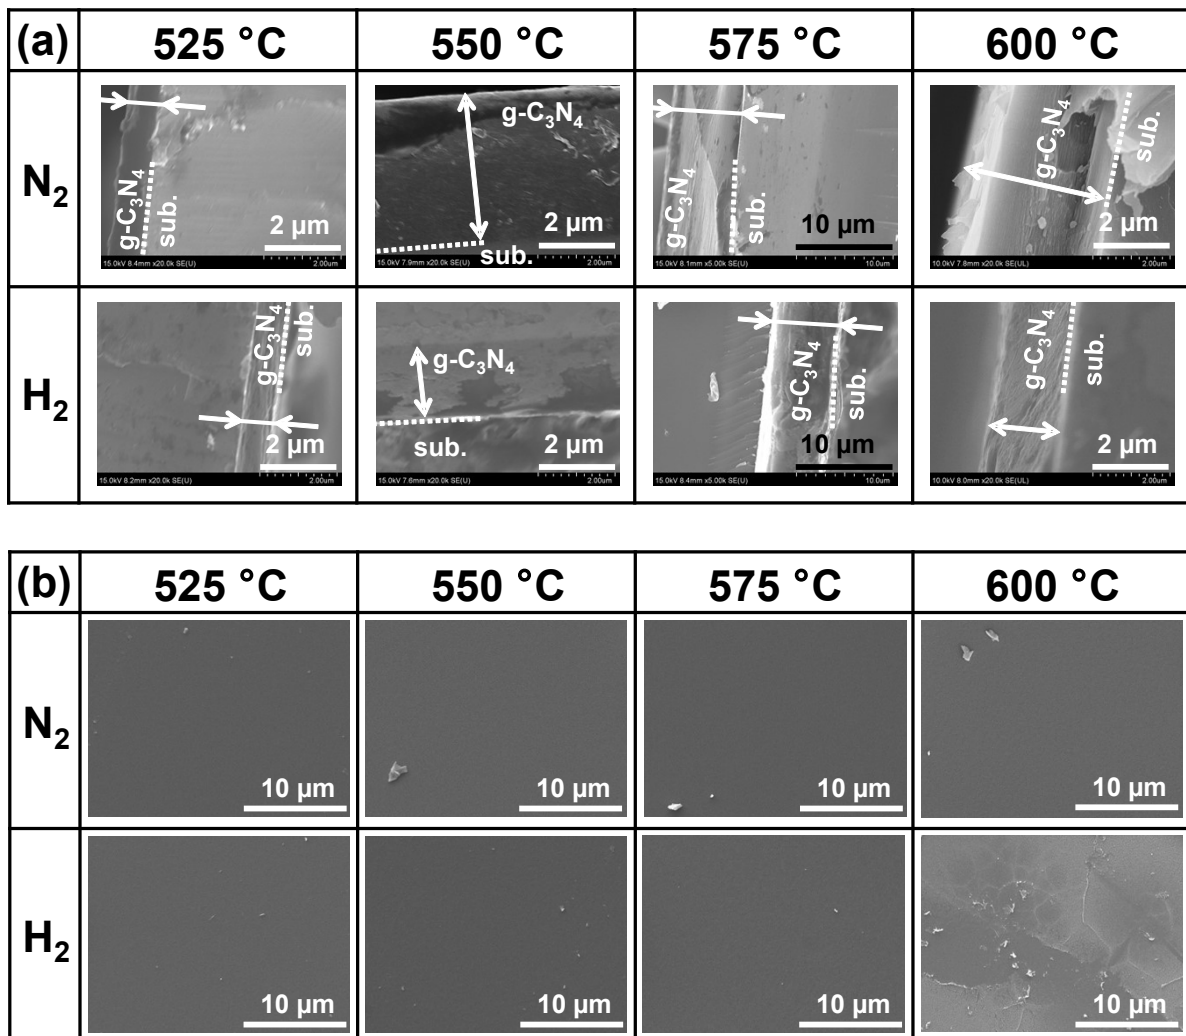

**Figure S2.** (a) Cross-sectional SEM images of g-C<sub>3</sub>N<sub>4</sub> films deposited at various substrate temperatures under N<sub>2</sub> and H<sub>2</sub> gas flow. Scale bar is 2 μm for 525, 550 and 600 °C and is 10 μm for 575 °C. (b) Plan-view scanning electron microscopy (SEM) images of g-C<sub>3</sub>N<sub>4</sub> films deposited at various substrate temperatures under N<sub>2</sub> and H<sub>2</sub> gas flow. Scale bar is 10 μm. The SEM equipment with cold-field emission (SU8000, Hitachi High-Tech Corp.) was used. To prevent charge-up during SEM observation, a few nm-thick platinum film was deposited on the film surface.

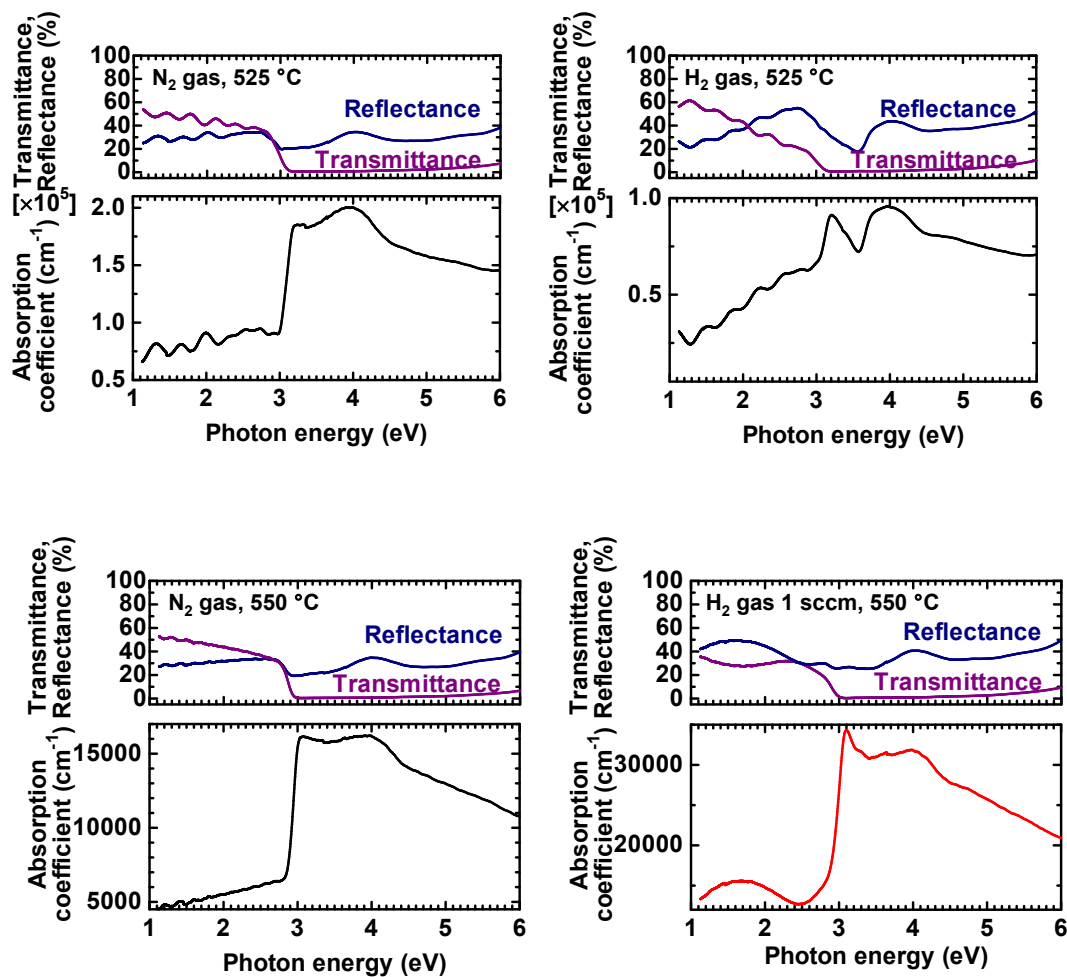

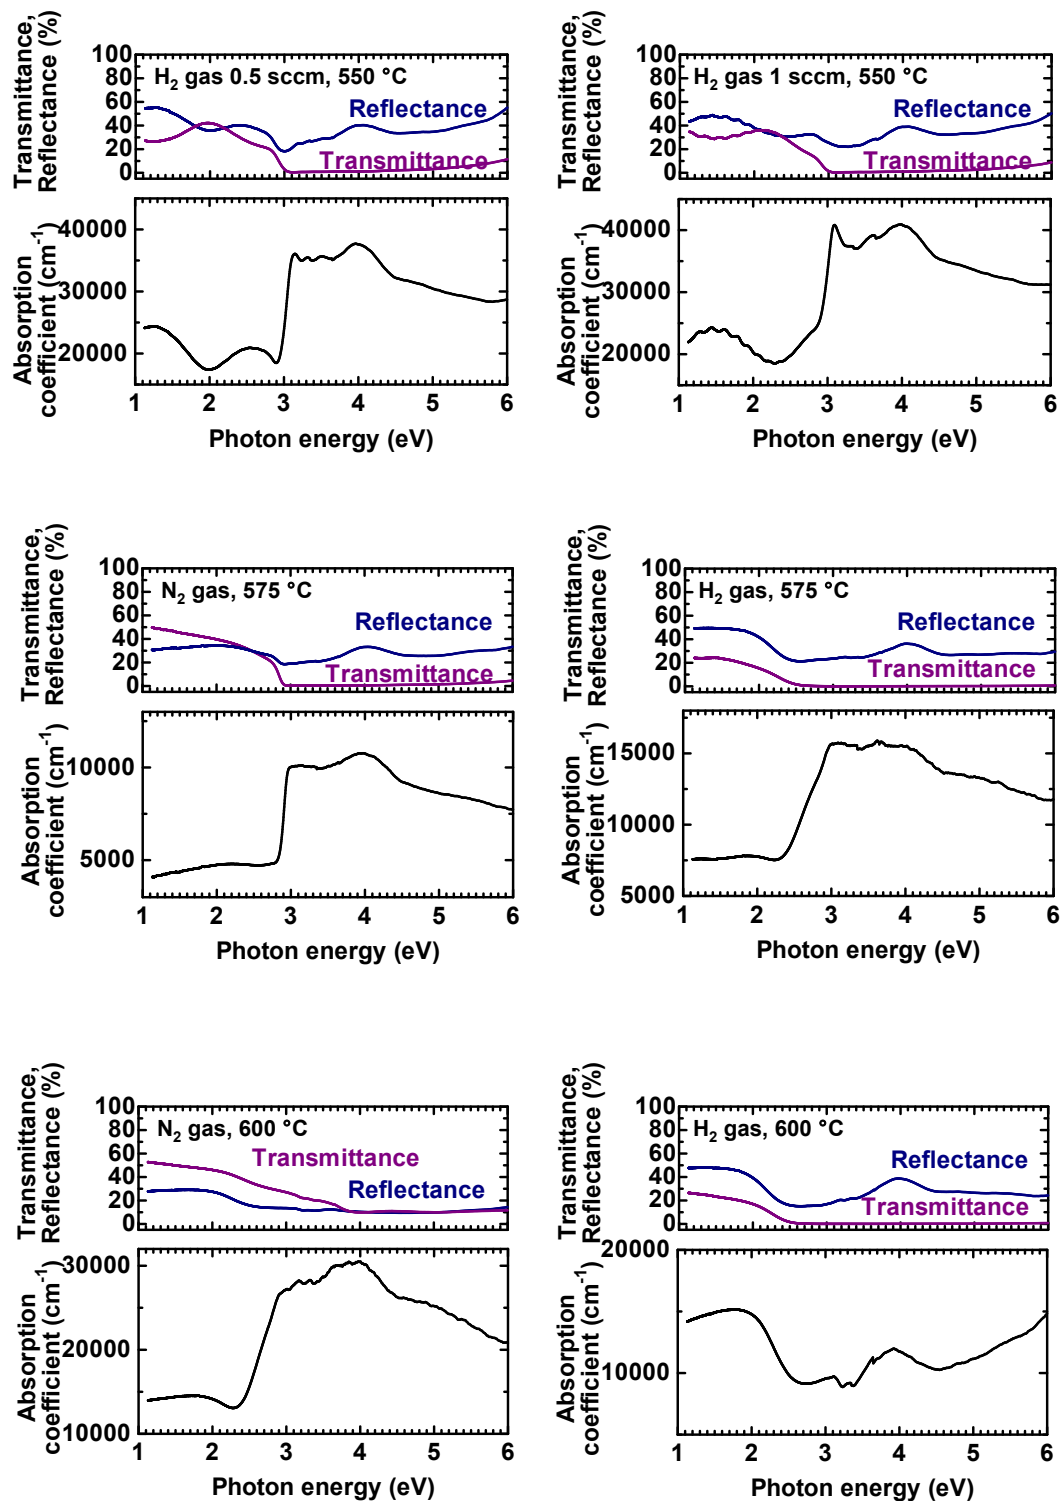

**Figure S3.** Optical absorption coefficient for g-C<sub>3</sub>N<sub>4</sub> films estimated using transmittance and reflectance spectroscopy. (Upper) Transmittance and reflectance spectra and (lower) absorption coefficient depending on photon energy. (Left) Deposition under N<sub>2</sub> gas flow and (right) deposition under H<sub>2</sub> gas flow.

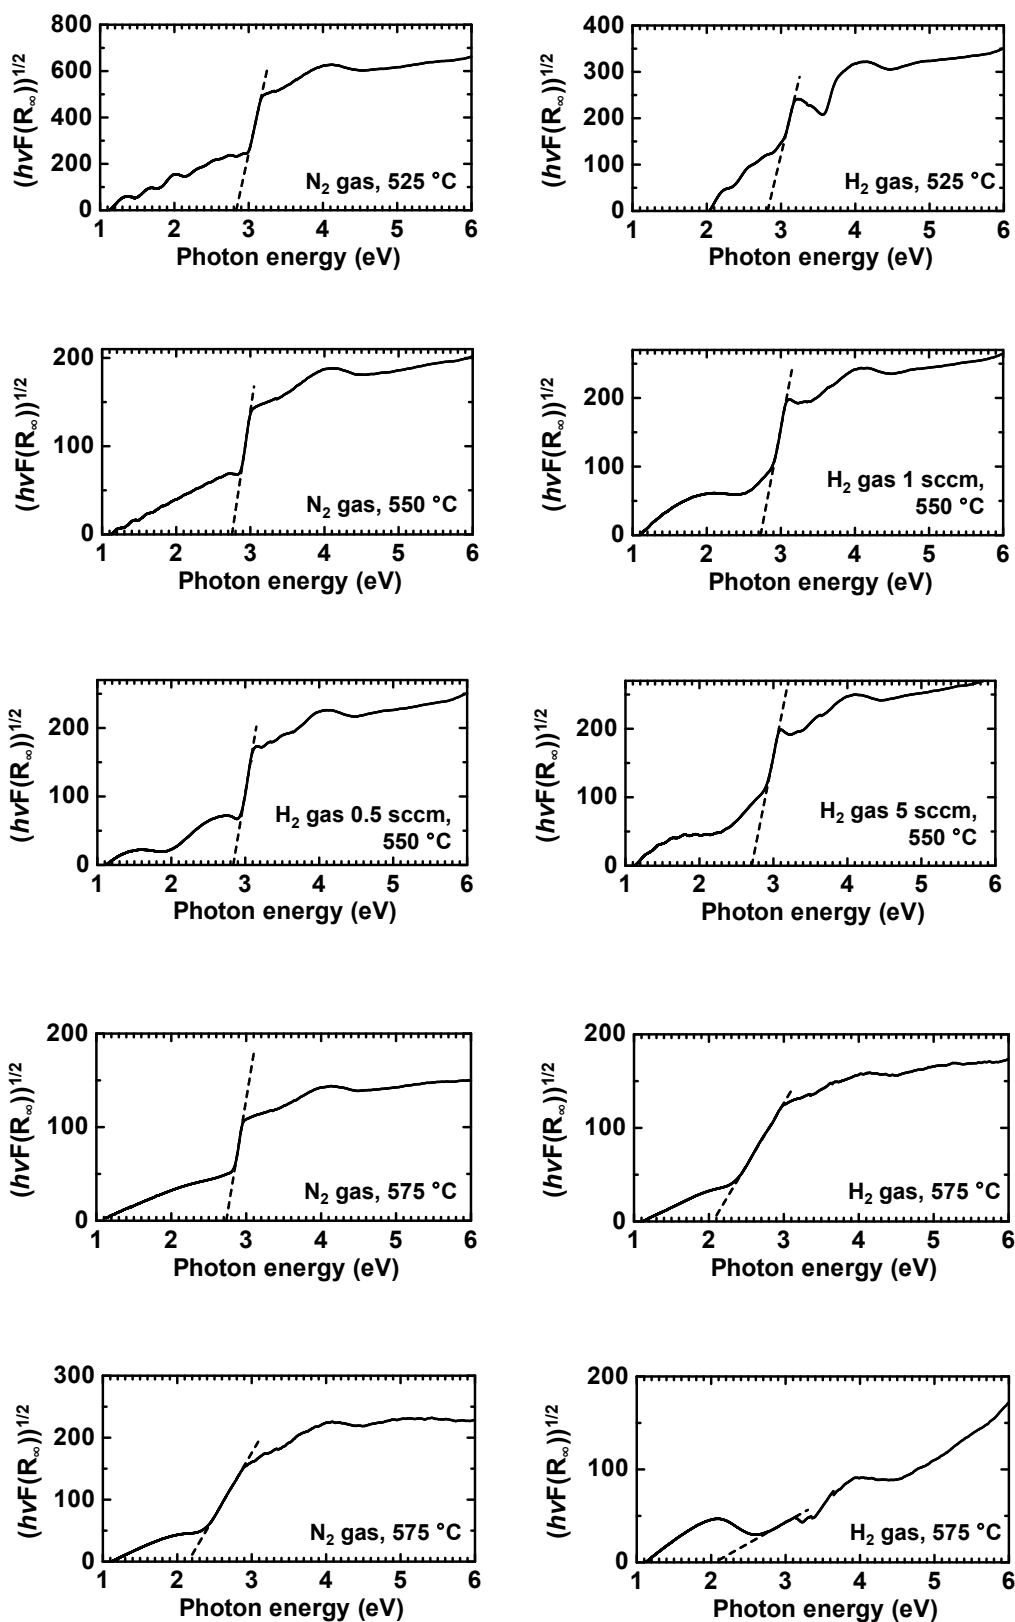

**Figure S4.** Kubelka-Munk plots of g-C<sub>3</sub>N<sub>4</sub> films, which were fitted to obtain the absorption coefficient as a function of photon energy.

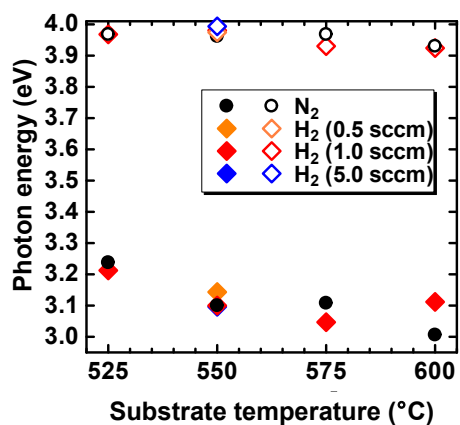

**Figure S5.** Absorption peaks at 3.0-3.1 eV and 4.0-4.1 eV originated from the transition between the conduction band and valence band for an  $sp^2$  C-N  $\pi$  band ( $\pi^*$ - $\pi$ ) and the transition between N nonbonding orbital and the aromatic nonbonding orbital ( $n$ - $\pi^*$ ), respectively.
